# Supplementary material for: Understanding experiments and research practices for reproducibility: an exploratory study
Source: PeerJ journal article supplement (doi:10.7717/peerj.11140), 2021-04-21

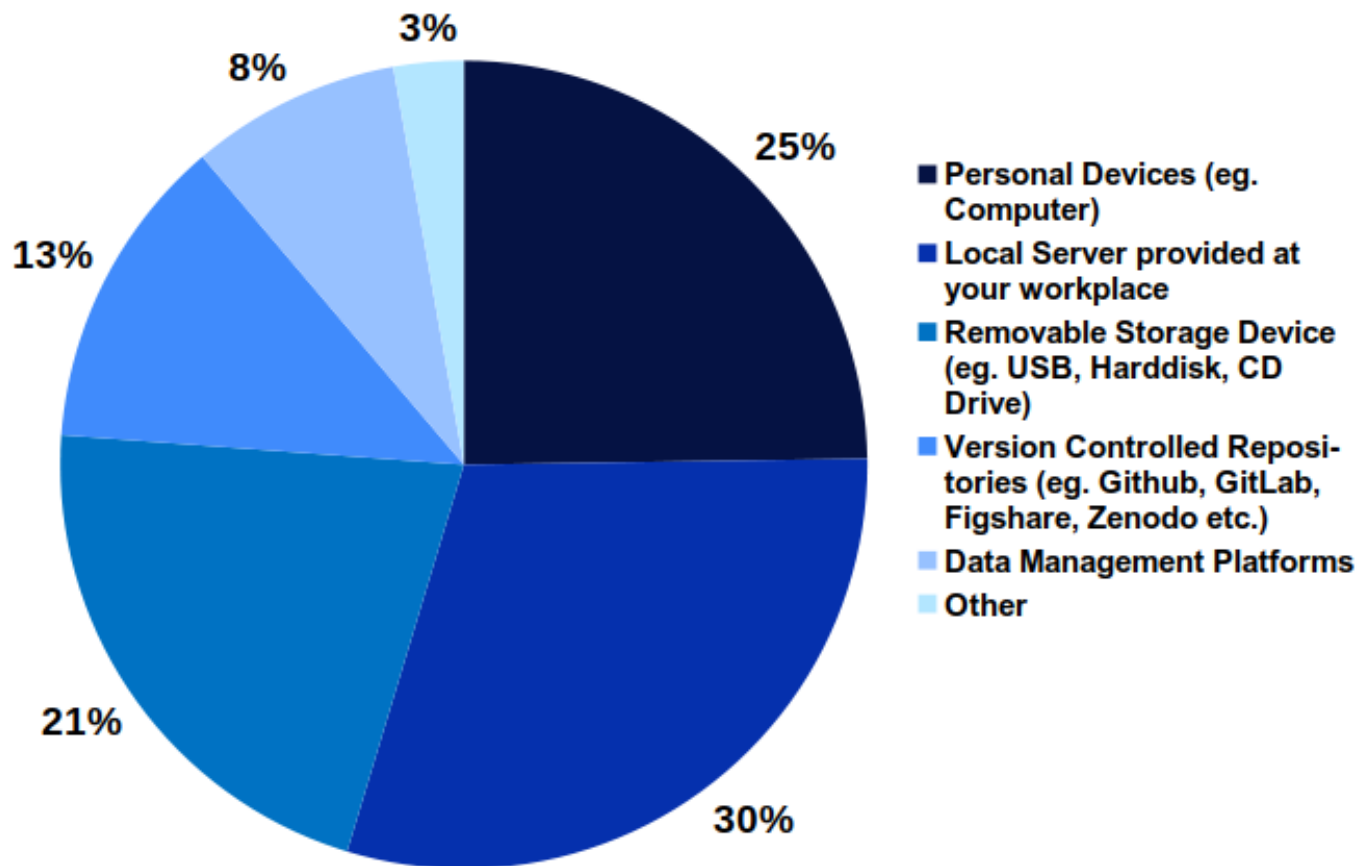

Supplement: Supplemental_Figure_S3.pdf [file Supplemental_Figure_S3.pdf]
